# Supplementary material
Source: HighWire-hosted journal article supplement (https://bmjopen.bmj.com/content/15/5/e086854)
Supplement: inline-supplementary-material-1 [file inline-supplementary-material-1.pdf]

Table S1 Characteristics of the participants.

| Variables               | n (%)       | Knowledge score |       | Attitude score |       | Practice score |       | Lifestyle score |       |
|-------------------------|-------------|-----------------|-------|----------------|-------|----------------|-------|-----------------|-------|
|                         |             | Mean ± SD       | P     | Mean ± SD      | P     | Mean ± SD      | P     | Mean ± SD       | P     |
| Gender                  |             |                 | 0.385 |                | 0.694 |                | 0.384 |                 | 0.027 |
| Male                    | 289 (71.89) | 6.69±3.39       |       | 41.32±4.63     |       | 30.86±3.98     |       | 41.95±6.24      |       |
| Female                  | 113 (28.11) | 6.35±3.79       |       | 41.10±6.05     |       | 30.45±4.73     |       | 43.43±5.36      |       |
| Age (years)             | 56.84±11.93 |                 |       |                |       |                |       |                 |       |
| Body mass index (kg/m²) |             |                 | 0.550 |                | 0.687 |                | 0.406 |                 | 0.570 |
| <18.5                   | 55 (13.68)  | 6.16±3.68       |       | 41.69±4.57     |       | 30.05±4.17     |       | 43.07±6.99      |       |
| 18.5-23.9               | 245 (60.95) | 6.61±3.44       |       | 41.09±5.13     |       | 30.90±4.37     |       | 42.36±5.78      |       |
| ≥24                     | 102 (25.37) | 6.80±3.59       |       | 41.41±5.16     |       | 30.75±3.78     |       | 42.00±6.12      |       |
| Residential area        |             |                 | 0.061 |                | 0.010 |                | 0.347 |                 | 0.274 |
| Rural                   | 225 (55.97) | 6.31±3.53       |       | 40.68±4.89     |       | 30.57±4.16     |       | 42.08±5.51      |       |

|                              |             |           |            |            |            |
|------------------------------|-------------|-----------|------------|------------|------------|
| City                         | 177 (44.03) | 6.97±3.46 | 41.99±5.19 | 30.97±4.25 | 42.74±6.65 |
| Residential status           |             | 0.560     | 0.035      | 0.084      | 0.136      |
| Living alone                 | 43 (10.70)  | 6.30±3.56 | 39.72±4.76 | 29.70±4.68 | 41.07±6.00 |
| Living with others           | 359 (89.30) | 6.63±3.50 | 41.44±5.07 | 30.87±4.13 | 42.52±6.03 |
| Marital Status               |             | 0.918     | 0.148      | 0.153      | 0.031      |
| Unmarried                    | 22 (5.47)   | 6.14±3.76 | 40.36±4.75 | 29.91±4.91 | 39.09±6.45 |
| Married                      | 362 (90.05) | 6.64±3.50 | 41.32±5.09 | 30.75±4.13 | 42.49±5.99 |
| Divorced                     | 8 (1.99)    | 6.25±3.49 | 38.25±5.47 | 29.50±5.53 | 42.38±5.15 |
| Widowed                      | 10 (2.49)   | 6.50±3.81 | 43.40±3.53 | 33.30±3.65 | 45.20±5.55 |
| Education                    |             | 0.426     | 0.449      | 0.310      | 0.233      |
| Junior high school and below | 79 (19.65)  | 6.56±3.60 | 40.96±5.89 | 30.01±4.85 | 42.67±5.95 |

|                                        |             |           |            |            |            |
|----------------------------------------|-------------|-----------|------------|------------|------------|
| High school/technical secondary school | 137 (34.08) | 6.33±3.60 | 41.72±4.61 | 31.25±3.66 | 42.81±5.69 |
| College                                | 112 (27.86) | 6.92±3.36 | 40.72±5.05 | 30.71±3.94 | 42.12±6.04 |
| Bachelor’s degree                      | 68 (16.92)  | 6.82±3.46 | 41.35±5.03 | 30.56±4.88 | 41.99±6.39 |
| Postgraduate and above                 | 6 (1.49)    | 4.67±3.27 | 43.33±3.33 | 31.67±2.25 | 37.33±9.61 |
| Average monthly income, RMB            |             | 0.500     | 0.005      | 0.276      | 0.094      |
| <2000                                  | 86 (21.39)  | 6.13±3.70 | 39.66±5.88 | 30.05±4.86 | 42.19±5.97 |
| 2000-5000                              | 196 (48.76) | 6.81±3.39 | 41.87±4.58 | 31.04±3.99 | 42.64±5.93 |
| 5001-10,000                            | 83 (20.65)  | 6.52±3.64 | 40.90±5.39 | 30.69±4.20 | 42.98±5.89 |
| 10,001-20,000                          | 23 (5.72)   | 6.30±3.50 | 41.87±3.86 | 30.22±3.69 | 39.26±6.88 |
| >20,000                                | 14 (3.48)   | 7.50±3.16 | 43.50±3.46 | 32.07±3.25 | 41.21±6.55 |
| Types of health insurance              |             |           |            |            |            |

|                       |             |           |            |            |            |
|-----------------------|-------------|-----------|------------|------------|------------|
| Urban Employee Basic  | 134 (33.33) | 6.94±3.37 | 41.70±4.90 | 30.93±4.11 | 42.82±5.96 |
| Medical Insurance     |             |           |            |            |            |
| New Rural Cooperative | 207 (51.49) | 6.24±3.57 | 40.87±5.16 | 30.76±4.15 | 41.91±6.08 |
| Medical Insurance     |             |           |            |            |            |
| Urban Resident Basic  | 53 (13.18)  | 7.11±3.46 | 42.06±4.72 | 30.75±3.95 | 43.66±5.73 |
| Medical Insurance     |             |           |            |            |            |
| Commercial Insurance  | 6 (1.49)    | 6.33±4.56 | 40.33±6.25 | 29.67±5.75 | 38.17±7.11 |
| Self-payment          | 2 (0.50)    | 8.00±1.41 | 33.00±1.41 | 20.00±8.49 | 38.00±4.24 |
| GI Symptoms           |             |           |            |            |            |
| Loss of appetite      | 113 (28.11) | 6.09±3.45 | 41.15±4.33 | 30.44±4.65 | 40.89±6.72 |
| Nausea and vomiting   | 54 (13.43)  | 6.80±3.20 | 40.89±4.90 | 29.81±5.12 | 39.52±7.87 |
| Constipation          | 53 (13.18)  | 6.25±3.59 | 40.72±5.26 | 29.70±4.22 | 40.13±6.30 |
| Diarrhea              | 34 (8.46)   | 7.41±2.84 | 40.88±3.67 | 30.00±4.71 | 41.15±6.63 |

|                          |             |           |            |            |            |       |
|--------------------------|-------------|-----------|------------|------------|------------|-------|
| Oral ulcers              | 18 (4.48)   | 6.94±3.46 | 41.89±4.17 | 31.56±4.08 | 39.89±8.63 |       |
| Dry Mouth                | 45 (11.19)  | 6.11±3.49 | 41.07±4.86 | 30.24±4.78 | 41.91±6.78 |       |
| Altered taste perception | 27 (6.72)   | 5.37±3.56 | 40.44±4.97 | 30.81±5.58 | 41.59±8.02 |       |
| Altered smell perception | 8 (1.99)    | 4.75±3.45 | 41.13±3.72 | 29.13±6.13 | 41.00±8.64 |       |
| Swallowing Difficulties  | 13 (3.23)   | 6.38±3.64 | 40.08±6.49 | 29.31±5.99 | 41.38±7.09 |       |
| Feeling of fullness      | 48 (11.94)  | 5.65±3.44 | 41.65±4.35 | 31.40±4.34 | 43.33±6.57 |       |
| Pain                     | 66 (16.42)  | 6.39±3.71 | 42.29±4.04 | 30.56±3.89 | 43.06±6.00 |       |
| None                     | 198 (49.25) | 6.80±3.52 | 40.98±5.45 | 30.88±4.07 | 43.28±5.18 |       |
| IrAEs                    |             |           | 0.527      | 0.276      | 0.122      | 0.954 |
| Yes                      | 41 (10.20)  | 6.27±3.78 | 42.07±4.42 | 29.78±4.18 | 42.32±6.60 |       |
| No                       | 361 (89.80) | 6.63±3.48 | 41.16±5.13 | 30.85±4.20 | 42.37±5.98 |       |
| Symptoms you experienced |             |           |            |            |            |       |

|                                                                                        |           |           |            |            |             |
|----------------------------------------------------------------------------------------|-----------|-----------|------------|------------|-------------|
| Capillary Proliferation Syndrome                                                       | 9 (2.24)  | 4.89±3.95 | 41.11±3.37 | 31.00±2.55 | 42.78±7.66  |
| Other skin reactions (rash, papules, itching, vitiligo, etc.)                          | 18 (4.48) | 6.89±3.41 | 40.94±4.32 | 30.83±3.17 | 41.67±7.04  |
| Gastrointestinal reactions (diarrhea, colitis, abdominal pain, nausea, vomiting, etc.) | 16 (3.98) | 6.75±3.24 | 41.75±4.30 | 30.00±4.76 | 40.25±6.22  |
| Hepatic reactions                                                                      | 7 (1.74)  | 5.14±3.39 | 43.29±3.99 | 30.43±3.99 | 43.86±7.24  |
| Endocrine reactions (hypothyroidism,                                                   | 2 (0.50)  | 9.50±0.71 | 40.00±8.49 | 26.00±8.49 | 35.00±11.31 |

|                            |             |           |            |            |            |
|----------------------------|-------------|-----------|------------|------------|------------|
| hyperthyroidism, adrenal   |             |           |            |            |            |
| insufficiency, etc.)       |             |           |            |            |            |
| Pneumonia                  | 1 (0.25)    | 9.00      | 40         | 29         | 30         |
| Cardiac reactions          | 0           | 0         | 0          | 0          | 0          |
| Renal toxicity (nephritis) | 0           | 0         | 0          | 0          | 0          |
| Muscle or joint pain,      | 13 (3.23)   | 5.85±3.74 | 41.92±4.82 | 30.08±5.85 | 44.92±2.99 |
| muscle weakness            |             |           |            |            |            |
| Other                      | 4 (1.00)    | 7.50±4.36 | 39.75±5.06 | 27.75±5.44 | 41.00±9.56 |
| Number                     | of          |           | 0.736      | 0.529      | 0.620      |
| immunotherapy              |             |           |            |            |            |
| medication                 |             |           |            |            |            |
| 1                          | 218 (54.23) | 6.65±3.50 | 41.11±5.04 | 30.84±3.71 | 41.45±5.88 |
| >1                         | 184 (45.77) | 6.53±3.52 | 41.43±5.09 | 30.63±4.73 | 43.46±6.06 |

|                                                             |             |           |            |            |            |       |
|-------------------------------------------------------------|-------------|-----------|------------|------------|------------|-------|
| Familiar with the specific names of the immunotherapy drugs |             |           | 0.990      | 0.724      | 0.806      | 0.884 |
| Yes                                                         | 140 (34.83) | 6.60±3.62 | 41.38±5.03 | 30.81±4.34 | 42.43±6.71 |       |
| No                                                          | 262 (65.17) | 6.60±3.45 | 41.19±5.09 | 30.71±4.13 | 42.34±5.66 |       |

RMB: renminbi, the official currency in China.



Table S2. Knowledge, attitudes, and practices

| Statement                                                                                                                                                                                                                                                                                                                                                                   | Accuracy, n (%) |
|-----------------------------------------------------------------------------------------------------------------------------------------------------------------------------------------------------------------------------------------------------------------------------------------------------------------------------------------------------------------------------|-----------------|
| K1. Adverse reactions can occur during immunotherapy, but they are normal occurrences that do not require excessive attention.                                                                                                                                                                                                                                              | 204 (50.75)     |
| K2. Skin toxicities (rashes, dermatitis, capillary proliferation), endocrine toxicities (hypothyroidism, hyperthyroidism, adrenal insufficiency), hepatic toxicities, cardiac toxicities, gastrointestinal toxicities (abdominal pain, diarrhea), pneumonia, renal toxicity (immune nephritis leading to proteinuria), etc., might emerge during the immunotherapy process. | 247 (61.44)     |
| K3. The liver is engaged in digestion, synthesis, and metabolic processes of various nutrients; impaired liver function significantly elevates the incidence of malnutrition in liver cancer patients.                                                                                                                                                                      | 245 (60.95)     |
| K4. Tumor progression and immunotherapy can exacerbate malnutrition due to deteriorating liver function, which, in turn, affects the prognosis of liver cancer patients, leading to a vicious cycle.                                                                                                                                                                        | 231 (57.46)     |

- K5. Liver cancer patients undergoing treatment should undergo nutritional screening and assessment, followed by personalized nutritional interventions based on their nutritional status.

281 (69.90)
- K6. Nutritional risk screening and assessment include disease status, dietary surveys, weight changes, anthropometric measurements, laboratory examinations, etc.

290 (72.14)
- K7. Nutritional support encompasses dietary guidance, oral supplements, enteral nutrition, and parenteral nutrition.

283 (70.40)
- K8. Appropriate and effective nutritional interventions can optimize the intake structure and quantity of nutrients, improve nutritional status and liver function, enhance tolerance to surgery or other treatments, enhance immune conditions, reduce complications during treatment, elevate quality of life, and extend survival time.

290 (72.14)
- K9. Prompt identification and timely reporting of symptoms of malnutrition and immune-related events to healthcare professionals are not only beneficial for immunotherapy and ameliorating immune-related adverse symptoms and nutritional status but also increase the likelihood of continuing immunotherapy.

291 (72.39)

K10. Liver cancer patients receiving immunotherapy should be managed comprehensively throughout the cycle, from 290 (72.14) screening and assessment to diagnosis, supportive treatment, monitoring, and follow-up, focusing on nutritional and adverse event management.

| Attitude                                                                                             | Strongly Agree | Agree       | Neutral   | Disagree | Strongly Disagree |
|------------------------------------------------------------------------------------------------------|----------------|-------------|-----------|----------|-------------------|
| A1. I consider nutritional support highly significant throughout the entire course of immunotherapy. | 230 (27.21)    | 150 (37.31) | 16 (3.98) | 2 (0.50) | 4 (1.00)          |
| A2. I believe that targeted nutritional interventions can enhance the efficacy of immunotherapy.     | 196 (48.76)    | 175 (43.53) | 25 (6.22) | 2 (0.50) | 4 (1.00)          |
| A3. I deem continuous monitoring of adverse immune events to be essential.                           | 208 (51.74)    | 160 (39.80) | 32 (7.96) | 0        | 2 (0.50)          |
| A4. I would be concerned about adverse reactions following immunotherapy.                            | 169 (42.04)    | 183 (45.52) | 36 (8.96) | 6 (1.49) | 8 (1.99)          |

|                                                                                                                                                                                    |             |             |            |          |          |
|------------------------------------------------------------------------------------------------------------------------------------------------------------------------------------|-------------|-------------|------------|----------|----------|
| A5. I find it necessary to monitor nutrition-related indicators comprehensively.                                                                                                   | 188 (46.77) | 172 (42.79) | 30 (7.46)  | 6 (1.49) | 6 (1.49) |
| A6. I think consuming high-quality proteins, abundant dietary fiber, and appropriate carbohydrates is crucial.                                                                     | 216 (53.73) | 158 (39.30) | 23 (5.72)  | 3 (0.75) | 2 (0.50) |
| A7. I wish to acquire further knowledge about nutritional support through professional channels.                                                                                   | 200 (49.75) | 163 (40.55) | 32 (7.96)  | 2 (0.50) | 5 (1.24) |
| A8. I desire to gain more insights through professional channels regarding self-management, emergency responses, and precautions for managing adverse events during immunotherapy. | 193 (48.01) | 175 (43.53) | 27 (6.72)  | 4 (1.00) | 3 (0.75) |
| A9. I am confident in maintaining a relatively favorable nutritional status.                                                                                                       | 179 (44.53) | 165 (41.04) | 45 (11.19) | 7 (1.74) | 6 (1.49) |

A10. I believe that maintaining a positive mindset and quality sleep are important during immunotherapy.

| Practice                                                                                                                                                  | Always      | Frequently  | Sometimes  | Occasionally | Never     |
|-----------------------------------------------------------------------------------------------------------------------------------------------------------|-------------|-------------|------------|--------------|-----------|
| P1. I can cooperate with medical personnel for comprehensive treatment monitoring and follow-up.                                                          | 216 (53.73) | 130 (32.34) | 43 (10.70) | 6 (1.49)     | 7 (1.74)  |
| P2. I will regularly monitor nutrition-related indicators such as body weight, body mass index, grip strength, albumin, and prognostic nutritional index. | 177 (44.03) | 140 (34.83) | 55 (13.68) | 22 (5.47)    | 8 (1.99)  |
| P3. If a physician recommends it, I will take medication to enhance appetite, digestion, and absorption.                                                  | 192 (47.76) | 132 (32.84) | 53 (13.18) | 18 (4.48)    | 7 (1.74)  |
| P4. I will proactively seek relevant knowledge about immunotherapy nutrition and adverse reactions through                                                | 172 (42.79) | 126 (31.34) | 64 (15.92) | 27 (6.72)    | 13 (3.23) |

|                                                           |             |              |            |            |             |
|-----------------------------------------------------------|-------------|--------------|------------|------------|-------------|
| professional channels such as healthcare providers,       |             |              |            |            |             |
| health promotion columns, books, and television.          |             |              |            |            |             |
| P5. I will undergo oral nutritional supplementation,      | 162 (40.30) | 118 (29.35)  | 60 (14.93) | 31 (7.71)  | 31 (7.71)   |
| including branched-chain amino acids, omega-3 fatty       |             |              |            |            |             |
| acids, and vitamin D if necessary.                        |             |              |            |            |             |
| P6. If required, I am prepared to receive enteral feeding | 133 (33.08) | 38 (6.45)    | 46 (11.44) | 36 (8.96)  | 149 (37.06) |
| through nasogastric/nasoenteric tubes.                    |             |              |            |            |             |
| P7. If necessary, I am open to receiving parenteral       | 123 (30.60) | 43 (10.70)   | 52 (12.94) | 56 (13.93) | 128 (31.84) |
| nutrition support (intravenous administration).           |             |              |            |            |             |
| P8. I will maintain moderate physical exercise to         | 176 (43.78) | 122 (30.35)  | 55 (13.68) | 34 (8.46)  | 15 (3.73)   |
| improve my overall physical condition.                    |             |              |            |            |             |
| Lifestyle                                                 | Never       | Occasionally | Sometimes  | Frequently | Always      |

**In your daily lifestyle habits, what is your eating**

**frequency for the following types:**

|                                                                                                      |             |             |            |             |            |
|------------------------------------------------------------------------------------------------------|-------------|-------------|------------|-------------|------------|
| L1. Smoking                                                                                          | 272 (67.66) | 38 (9.45)   | 27 (63.72) | 35 (8.71)   | 30 (7.46)  |
| L2. Alcohol consumption                                                                              | 285 (70.90) | 52 (12.94)  | 27 (6.72)  | 21 (5.22)   | 17 (4.23)  |
| L3. Cooking methods involving frying, smoking, baking, pickling, etc.                                | 223 (55.47) | 100 (24.88) | 47 (11.69) | 19 (4.73)   | 13 (3.23)  |
| L4. High-fat, high-salt, spicy foods (such as chili peppers, onions, ginger, raw garlic, and pepper) | 212 (52.74) | 100 (24.88) | 50 (12.44) | 27 (6.72)   | 13 (3.23)  |
| L5. High-quality protein sources (legumes, eggs, meat, fish, shellfish, dairy products, etc.)        | 22 (5.47)   | 21 (5.22)   | 37 (9.20)  | 224 (55.72) | 98 (24.38) |
| L6. Light and easily digestible foods (egg custard, millet porridge, lotus root powder, Chinese yam) | 15 (3.73)   | 42 (10.45)  | 61 (15.17) | 213 (52.99) | 71 (17.66) |

|                                                                                                          |             |             |            |             |             |
|----------------------------------------------------------------------------------------------------------|-------------|-------------|------------|-------------|-------------|
| L7. Foods rich in vitamins (fresh vegetables and fruits, such as spinach, cabbage, kiwi, tomatoes, etc.) | 8 (1.99)    | 34 (8.46)   | 42 (10.45) | 217 (53.98) | 101 (25.12) |
| L8. Stimulants like coffee, chocolate, and strong tea                                                    | 247 (61.44) | 70 (17.41)  | 30 (7.46)  | 38 (9.45)   | 17 (4.23)   |
| L9. Probiotics                                                                                           | 202 (50.25) | 90 (22.39)  | 51 (12.69) | 37 (9.20)   | 22 (5.47)   |
| L10. Sugary beverages                                                                                    | 215 (53.48) | 114 (28.36) | 45 (11.19) | 20 (4.98)   | 8 (1.99)    |
| L11. Citrus fruits (grapefruit, pomelo, honey pomelo, etc.)                                              | 93 (23.13)  | 112 (27.86) | 75 (18.66) | 92 (22.89)  | 30 (7.46)   |



Table S3. SEM model fit

| Indicators | Reference               | Results |
|------------|-------------------------|---------|
| CMIN/DF    | 1-3 Excellent, 3-5 Good | 1.610   |
| RMSEA      | <0.08 Good              | 0.039   |
| IFI        | >0.8 Good               | 0.939   |
| TLI        | >0.8 Good               | 0.893   |
| CFI        | >0.8 Good               | 0.935   |
